# Supplementary material for: Synthesis and Characterization of Sterically Encumbered β-Ketoiminate Complexes of Iron(ii) and Zinc(ii)
Source: Royal Society of Chemistry journal article supplement (doi:10.1039/c1dt10024f), 2011-01-01
Supplement: c1dt10024f.pdf [file c1dt10024f.pdf]

## Supplementary Materials for

# Synthesis and Characterization of Sterically Encumbered $\beta$ -Ketoiminate Complexes of Iron(II) and Zinc(II)

David M. Granum,<sup>a,b</sup> Paul J. Riedel,<sup>a,b</sup> Joshua A. Crawford,<sup>c</sup> Thomas K. Mahle,<sup>a</sup> Chelsea M. Wyss,<sup>a</sup> Anastasia K. Begej,<sup>a</sup> Navamoney Arulsamy,<sup>a</sup> Brad S. Pierce,<sup>c</sup> and Mark P. Mehn<sup>\*a</sup>

### Supplementary Materials Available:

**Scheme S1.** Three HL<sup>R</sup> tautomers with resonance structures.

**Scheme S2.** Lettering for <sup>1</sup>H (lower case) and <sup>13</sup>C (upper case) NMR assignments.

**Table S1.** <sup>1</sup>HNMR assignments for HL<sup>R</sup> in CDCl<sub>3</sub> taken at room temperature.

**Table S2.** <sup>13</sup>C NMR assignments for HL<sup>R</sup> in CDCl<sub>3</sub> taken at room temperature.

**Table S3.** Comparison of bond distances in  $\beta$ -ketoiminate backbones.

**Figure S1.** Cyclic voltammograms (CV) of A) 1.0 mM [Fe(L<sup>iPr</sup>)<sub>2</sub>] (---, top panel) and [Fe(L<sup>dipp</sup>)<sub>2</sub>] (—, top panel), and B) [Zn(L<sup>iPr</sup>)<sub>2</sub>] (--- bottom panel) and [Zn(L<sup>dipp</sup>)<sub>2</sub>] (— bottom panel) in THF at room temperature under nitrogen with 0.4 M (<sup>t</sup>Bu<sub>4</sub>N)(ClO<sub>4</sub>) as supporting electrolyte.

**Figure S2.** Temperature dependence of the *S* = 2 signal **2b** (●) for the [Fe(L<sup>dipp</sup>)<sub>2</sub>] complex.

**Equation S1.**

**Figure S3.** Preliminary molecular orbital splitting diagram for [Fe(L<sup>dipp</sup>)<sub>2</sub>] showing descent from ideal tetrahedral symmetry.

**Figure S4.** Electronic spectra of 0.613 mM [Fe(L<sup>iPr</sup>)<sub>2</sub>] in THF upon exposure to O<sub>2</sub> (~10 mM assuming saturation of the THF solution, cycle time 2.5 min) for 2 hours. Inset: Representative kinetic trace following the growth and decay of the intensity at 375 nm.

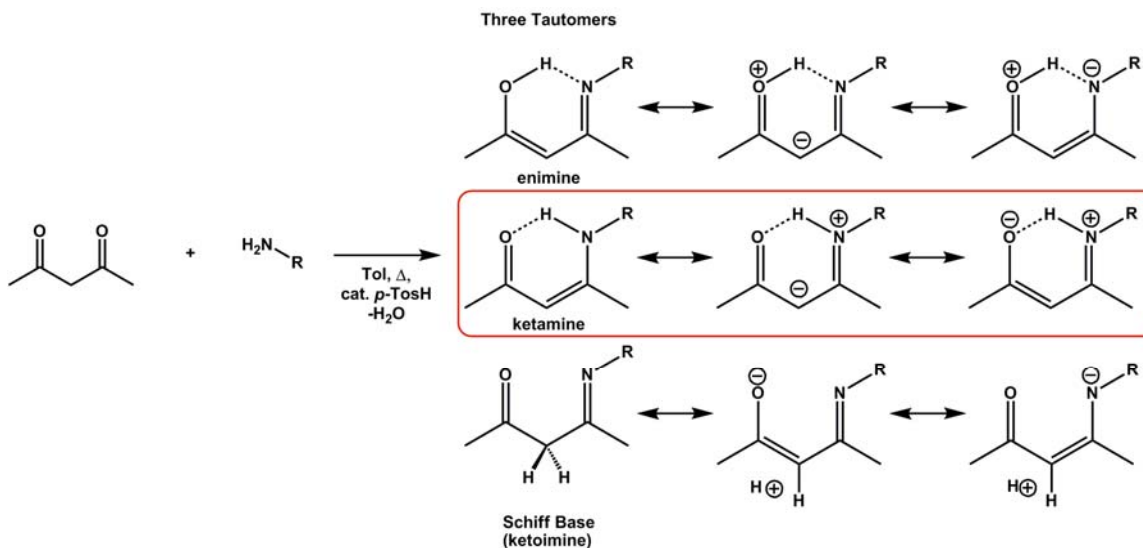

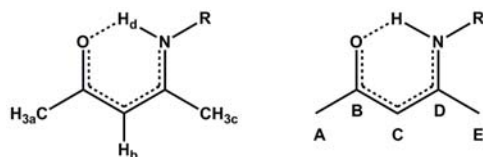

Scheme S2. Lettering for  $^1\text{H}$  (lower case) and  $^{13}\text{C}$  (upper case) NMR Assignments.

Table S1.  $^1\text{H}$  NMR assignments for  $\text{HL}^{\text{R}}$  in  $\text{CDCl}_3$  taken at room temperature.

| Assignments | R = -iPr                              | R = -C <sub>6</sub> H <sub>5</sub> | R = -3,5-Me <sub>2</sub> -C <sub>6</sub> H <sub>3</sub> | R = -2,6-iPr <sub>2</sub> -C <sub>6</sub> H <sub>3</sub> | R = -2,4,6-Me <sub>3</sub> -C <sub>6</sub> H <sub>2</sub> |
|-------------|---------------------------------------|------------------------------------|---------------------------------------------------------|----------------------------------------------------------|-----------------------------------------------------------|
| a           | 1.94                                  | 1.98                               | 2.08                                                    | 2.12                                                     | 2.10                                                      |
| b           | 4.87                                  | 5.07                               | 5.15                                                    | 5.21                                                     | 5.19                                                      |
| c           | 1.91                                  | 1.86                               | 1.98                                                    | 1.63                                                     | 1.63                                                      |
| d           | 10.79                                 | 12.40                              | 12.41                                                   | 12.05                                                    | 11.84                                                     |
| e           | 3.67                                  | -                                  | -                                                       | -                                                        | -                                                         |
|             | (-CH(CH <sub>3</sub> ) <sub>2</sub> ) |                                    |                                                         |                                                          |                                                           |
| f           | 1.20, 1.18                            | -                                  | -                                                       | -                                                        | -                                                         |
|             | (-CH(CH <sub>3</sub> ) <sub>2</sub> ) |                                    |                                                         |                                                          |                                                           |
| g           | -                                     | 6.97 (o)                           | 6.73 (o)                                                | -                                                        | -                                                         |
| h           | -                                     | 7.20 (m)                           | -                                                       | 7.17 (m)                                                 | 6.90 (m)                                                  |
| i           | -                                     | 7.05 (p)                           | 6.82 (p)                                                | 7.29 (p)                                                 | -                                                         |
| j           | -                                     | -                                  | 2.29 (-Me)                                              | 3.03                                                     | 2.15 (-Me)                                                |
|             |                                       |                                    |                                                         | (-CH(CH <sub>3</sub> ) <sub>2</sub> )                    |                                                           |
| k           | -                                     | -                                  | -                                                       | 1.21, 1.15                                               | 2.28 (-Me)                                                |
|             |                                       |                                    |                                                         | (-CH(CH <sub>3</sub> ) <sub>2</sub> )                    |                                                           |

Table S2.  $^{13}\text{C}$  NMR assignments for  $\text{HL}^{\text{R}}$  in  $\text{CDCl}_3$  taken at room temperature.

| Assignments | R = -iPr                              | R = -C <sub>6</sub> H <sub>5</sub> | R = -3,5-Me <sub>2</sub> -C <sub>6</sub> H <sub>3</sub> | R = -2,6-iPr <sub>2</sub> -C <sub>6</sub> H <sub>3</sub> | R = -2,4,6-Me <sub>3</sub> -C <sub>6</sub> H <sub>2</sub> |
|-------------|---------------------------------------|------------------------------------|---------------------------------------------------------|----------------------------------------------------------|-----------------------------------------------------------|
| A           | 28                                    | 29                                 | 29                                                      | 29                                                       | 29                                                        |
| B           | 194                                   | 196                                | 196                                                     | 196                                                      | 196                                                       |
| C           | 94                                    | 98                                 | 97                                                      | 96                                                       | 96                                                        |
| D           | 161                                   | 160                                | 160                                                     | 163                                                      | 163                                                       |
| E           | 18                                    | 20                                 | 19                                                      | 19                                                       | 19                                                        |
| F           | 44                                    | -                                  | -                                                       | -                                                        | -                                                         |
|             | (-CH(CH <sub>3</sub> ) <sub>2</sub> ) |                                    |                                                         |                                                          |                                                           |
| G           | 23                                    | -                                  | -                                                       | -                                                        | -                                                         |
|             | (-CH(CH <sub>3</sub> ) <sub>2</sub> ) |                                    |                                                         |                                                          |                                                           |
| H           | -                                     | 139 (ipso)                         | 138 (ipso)                                              | 133 (ipso)                                               | 137 (ipso)                                                |
| I           | -                                     | 129 (o)                            | 139 (o)                                                 | 147 (o)                                                  | 136 (o)                                                   |
| J           | -                                     | 125 (m)                            | 127 (m)                                                 | 124 (m)                                                  | 129 (m)                                                   |
| K           | -                                     | 126 (p)                            | 122 (p)                                                 | 128 (p)                                                  | 134 (p)                                                   |
| L           | -                                     | -                                  | 21 (-Me)                                                | 28                                                       | 21 (-Me)                                                  |
|             |                                       |                                    |                                                         | (-CH(CH <sub>3</sub> ) <sub>2</sub> )                    |                                                           |
| M           | -                                     | -                                  | -                                                       | 23, 25                                                   | 18 (-Me)                                                  |
|             |                                       |                                    |                                                         | (-CH(CH <sub>3</sub> ) <sub>2</sub> )                    |                                                           |

Table S3. Comparison of bond distances in  $\beta$ -ketoiminate backbones.

|                                | 1<br>[Fe(L <sup>iPr</sup> ) <sub>2</sub> ] |          | 2<br>[Zn(L <sup>iPr</sup> ) <sub>2</sub> ] |          | 3a<br>[Fe(HL <sup>dipp</sup> ) <sub>3</sub> (OTf) <sub>2</sub> ] |          |                    | 3b<br>[Fe(L <sup>dipp</sup> ) <sub>2</sub> ] |  | 4<br>[Zn(L <sup>dipp</sup> ) <sub>2</sub> ] |  |
|--------------------------------|--------------------------------------------|----------|--------------------------------------------|----------|------------------------------------------------------------------|----------|--------------------|----------------------------------------------|--|---------------------------------------------|--|
| O-C <sub>B</sub>               | 1.300(1)                                   | 1.293(1) | 1.297(1)                                   | 1.292(1) | 1.279(2), 1.277(2), 1.280(2)                                     | 1.289(1) | 1.277(2), 1.279(1) |                                              |  |                                             |  |
| N-C <sub>D</sub>               | 1.314(1)                                   | 1.314(1) | 1.309(1)                                   | 1.309(1) | 1.325(2), 1.324(2), 1.324(2)                                     | 1.321(1) | 1.326(1), 1.328(1) |                                              |  |                                             |  |
| C <sub>A</sub> -C <sub>B</sub> | 1.504(1)                                   | 1.506(2) | 1.503(2)                                   | 1.506(2) | 1.503(2), 1.495(2), 1.506(2)                                     | 1.501(2) | 1.505(2), 1.507(2) |                                              |  |                                             |  |
| C <sub>B</sub> -C <sub>C</sub> | 1.381(1)                                   | 1.380(1) | 1.382(2)                                   | 1.380(2) | 1.394(2), 1.394(2), 1.391(2)                                     | 1.380(2) | 1.388(2), 1.390(2) |                                              |  |                                             |  |
| C <sub>C</sub> -C <sub>D</sub> | 1.432(1)                                   | 1.434(1) | 1.433(1)                                   | 1.435(2) | 1.394(2), 1.394(2), 1.399(2)                                     | 1.416(1) | 1.410(2), 1.414(2) |                                              |  |                                             |  |
| C <sub>D</sub> -C <sub>E</sub> | 1.513(1)                                   | 1.513(1) | 1.511(2)                                   | 1.514(2) | 1.498(2), 1.498(2), 1.505(2)                                     | 1.507(1) | 1.510(2), 1.513(2) |                                              |  |                                             |  |

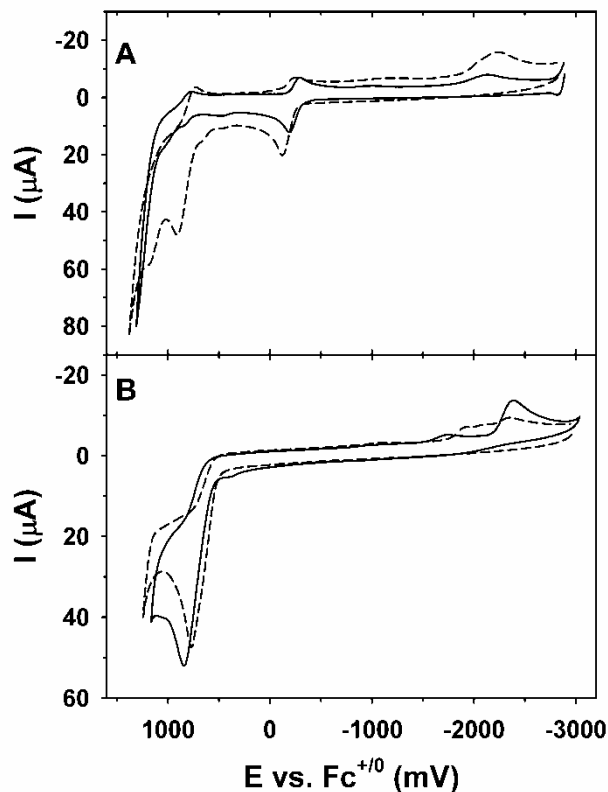

**Figure S1.** Cyclic voltammogram (CV) of A) 1.0 mM  $[\text{Fe}(\text{L}^{\text{ipr}})_2]$  (---, top panel) and  $[\text{Fe}(\text{L}^{\text{dpp}})_2]$  (— top panel), and B)  $[\text{Zn}(\text{L}^{\text{ipr}})_2]$  (--- bottom panel) and  $[\text{Zn}(\text{L}^{\text{dpp}})_2]$  (— bottom panel) in THF at room temperature under nitrogen with 0.4 M  $(^n\text{Bu}_4\text{N})(\text{ClO}_4)$  as supporting electrolyte.

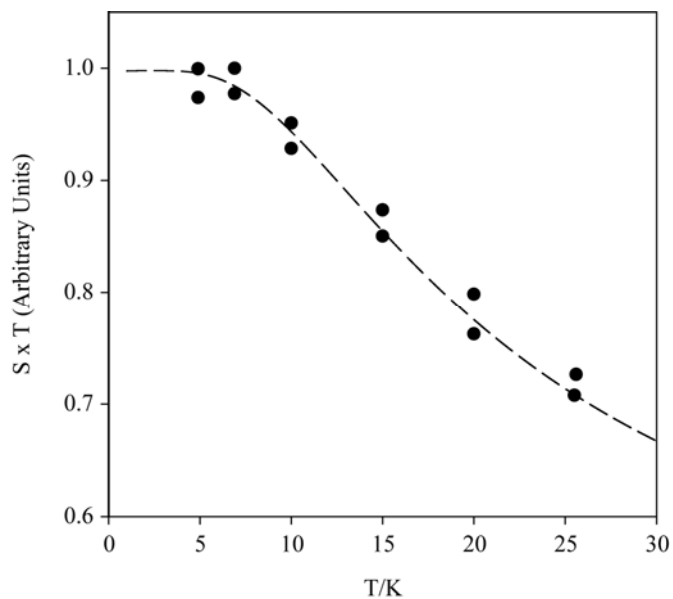

**Figure S2.** Normalized temperature dependence of the  $S = 2$  signal **2b** (●) for the  $[\text{Fe}(\text{L}^{\text{dpp}})_2]$  complex corrected for Curie Law dependence. The value for the axial zero-field splitting term ( $D = -7.1 \pm 0.8 \text{ cm}^{-1}$ ) was determined by fitting (dashed line) the data to a Boltzmann-dependent population distribution for a 3-level system (equation S1, below).

$$(\text{eq. S1}) \quad \text{Intensity} \times T \sim n_s = \frac{g_i \cdot e^{-\Delta E_i/k_b T}}{\sum_j g_j \cdot e^{-\Delta E_j/k_b T}} = \frac{(2S_i+1) \cdot e^{-DS_{z,i}^2/k_b T}}{\sum_j (2S_j+1) \cdot e^{-DS_{z,j}^2/k_b T}}$$

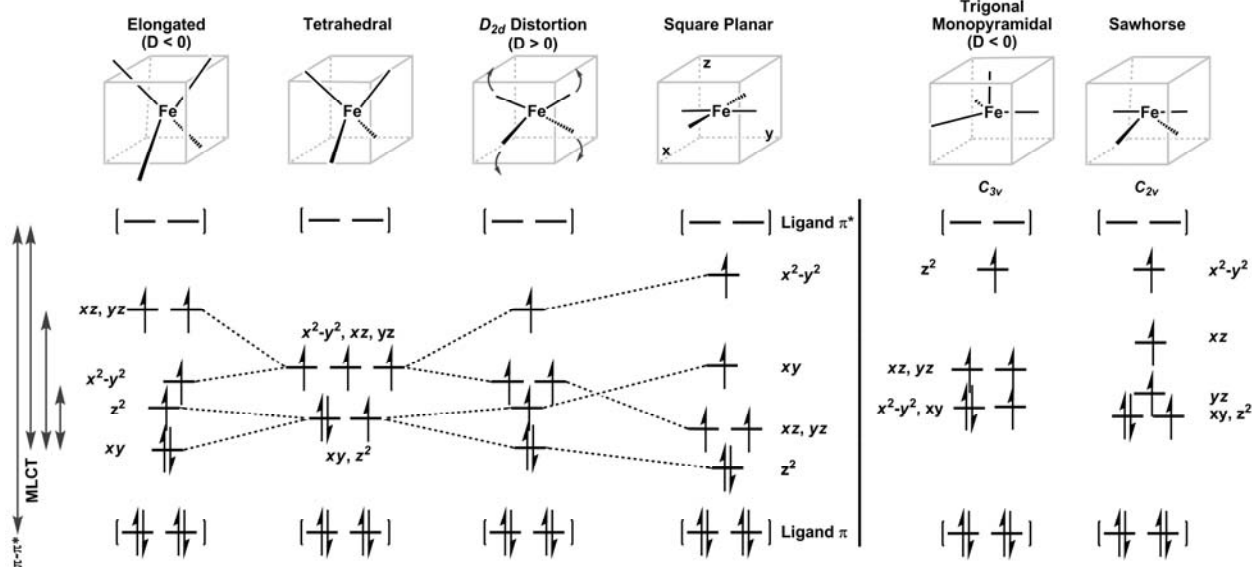

**Figure S3.** Preliminary molecular orbital splitting diagram for  $[\text{Fe}(\text{L}^{\text{dipp}})_2]$  showing descent from ideal tetrahedral symmetry. Adapted from E. I. Solomon, E. G. Pavel, K. E. Loeb, and C. Campochiaro, *Coord. Chem. Rev.*, 1995, **144**, 369-460 and S. Pulver, W. A. Froland, B. G. Fox, J. D. Lipscomb, and E. I. Solomon, *J. Am. Chem. Soc.*, 1993, **115**, 12409-12422. Please note that the coordinate axis is rotated by  $45^\circ$  from the typical depiction for a tetrahedral geometry (at the corners of the gray cube) to allow the correlation from square planar. The net result of this rotation is the interchange of the  $d(x^2-y^2)$  and  $d(xy)$  orbitals. Electronic transitions are shown as gray double headed arrows. The idealized splitting diagram for a trigonal monopyramidal ligand field under  $C_{3v}$  symmetry is taken from J. M. Mayer, D. L. Thorn, and T. H. Tulip, *J. Am. Chem. Soc.*, 1985, **107**, 7454-7462. The  $C_{2v}$  sawhorse splitting diagram comes from J. Cirera, E. Ruiz, and S. Alvarez, *Inorg. Chem.*, 2008, **47**, 2871-2889.

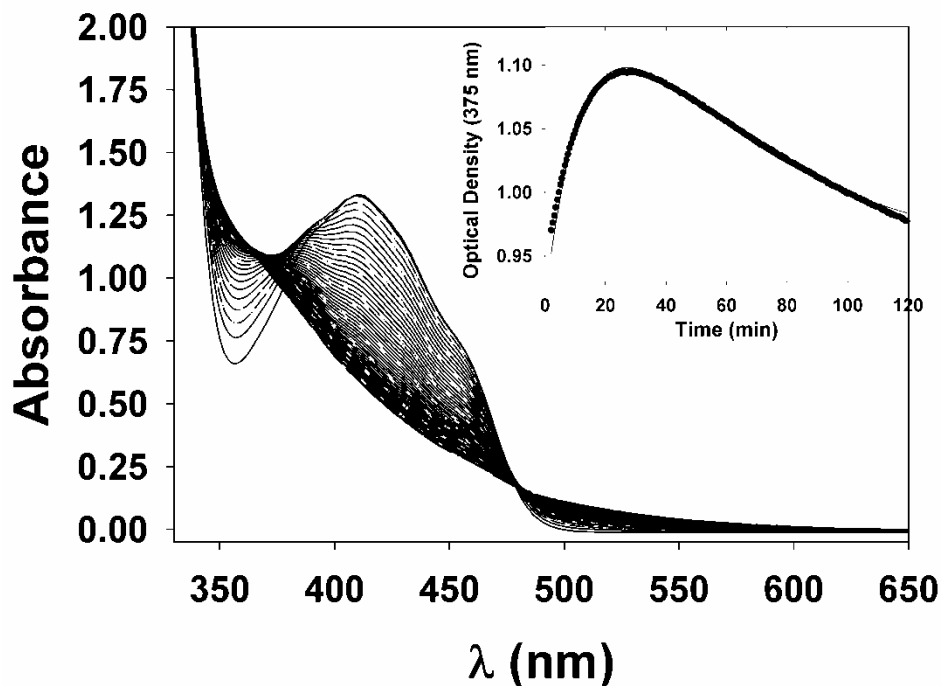

**Figure S4.** Electronic spectra of 0.613 mM  $[\text{Fe}(\text{L}^{\text{Pr}})_2]$  in THF upon exposure to  $\text{O}_2$  ( $\sim 10$  mM assuming saturation of the THF solution, cycle time 2.5 min) for 2 hours. Inset: Representative kinetic trace following the growth and decay of the intensity at 375 nm.
